# Supplementary material for: The Effects of Selenium on Rumen Fermentation Parameters and Microbial Metagenome in Goats
Source: MDPI journal article supplement (doi:10.3390/fermentation8050240), 2022-05-21
Supplement: s1 [file s1]

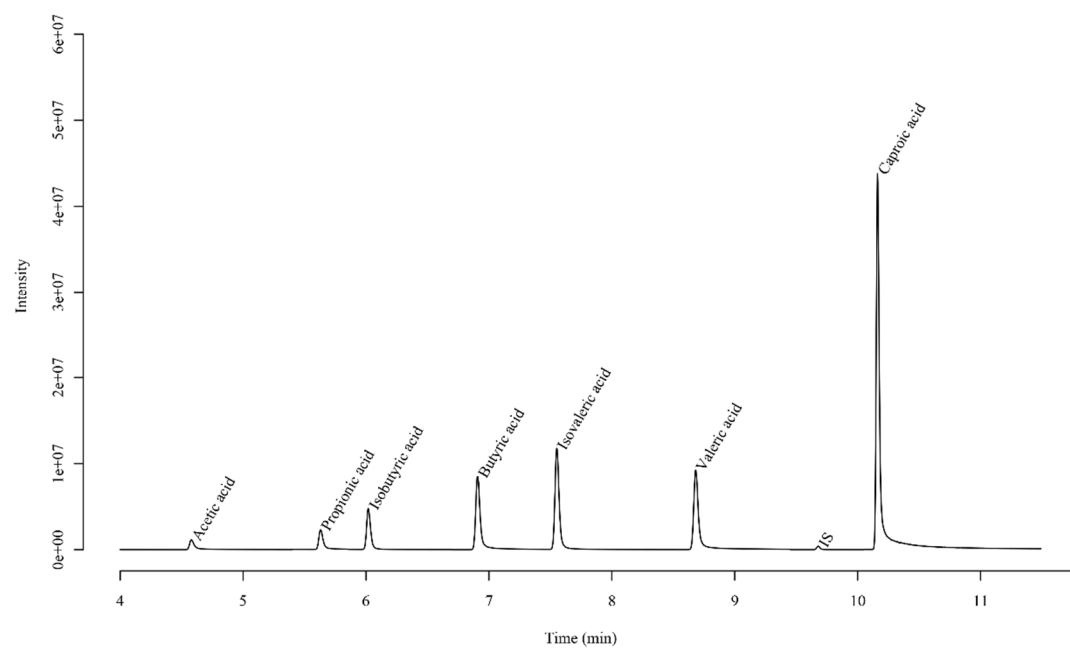

**Supplementary Figure S1.** Total ion current chromatograms of volatile fatty acids of mixed standard in ruminal fluid of goats.
