# Supplementary material for: The Effects of Selenium on Rumen Fermentation Parameters and Microbial Metagenome in Goats
Source: MDPI journal article supplement (doi:10.3390/fermentation8050240), 2022-05-21
Supplement: s1 [file s1]

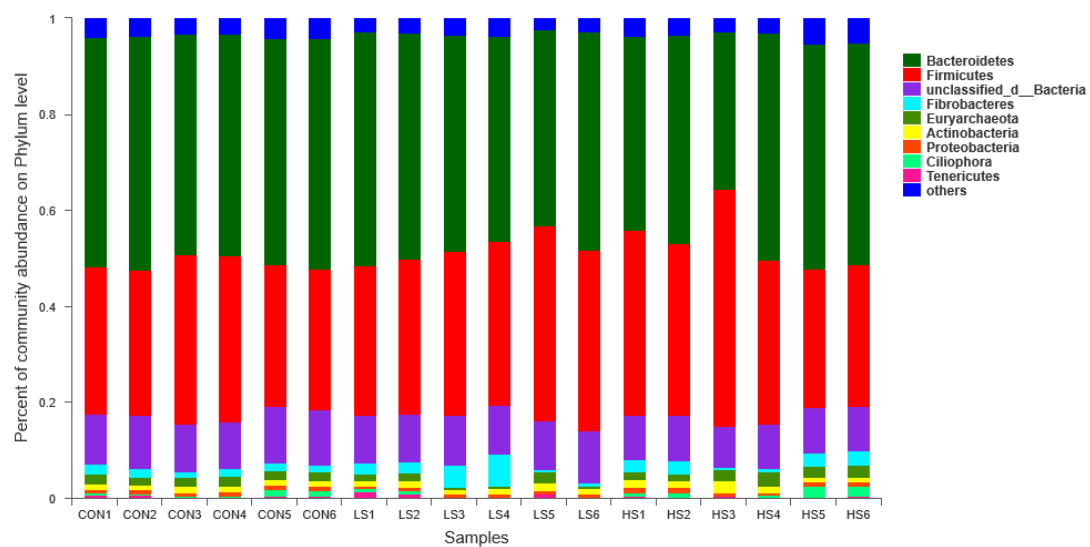

**Supplementary Figure S3.** The percent of community abundance on phylum level. CON = basal diet; LS = basal diet + 2.4 mg/kg SY; HS = basal diet + 4.8 mg/kg SY.
