# Supplementary material for: The Effects of Selenium on Rumen Fermentation Parameters and Microbial Metagenome in Goats
Source: MDPI journal article supplement (doi:10.3390/fermentation8050240), 2022-05-21
Supplement: s1 [file s1]

**Supplementary Table S2.** Summary of sequence data generated from rumen samples<sup>1</sup>.

| Samples | Raw base (GB) | Raw reads | Clean reads | Optimized reads | Contigs  | N50 (bp) | N90 (bp) | ORFs     |
|---------|---------------|-----------|-------------|-----------------|----------|----------|----------|----------|
| CON1    | 6.33          | 44982100  | 44123012    | 33331952        | 428763   | 621      | 344      | 532797   |
| CON2    | 6.90          | 49058934  | 48178398    | 36529562        | 495420   | 636      | 347      | 620609   |
| CON3    | 7.24          | 51461328  | 50437098    | 38444422        | 524758   | 647      | 348      | 656106   |
| CON4    | 6.32          | 44915450  | 44228590    | 34787078        | 470876   | 647      | 348      | 587669   |
| CON5    | 6.86          | 48803804  | 48154816    | 37701620        | 509980   | 642      | 348      | 635434   |
| CON6    | 6.86          | 48767796  | 48092874    | 34925330        | 473144   | 625      | 345      | 582817   |
| LS1     | 7.63          | 54268430  | 53634834    | 38961588        | 575411   | 652      | 349      | 718101   |
| LS2     | 7.18          | 51049444  | 50358364    | 32444762        | 492031   | 617      | 344      | 600586   |
| LS3     | 7.32          | 52029744  | 51066528    | 40893422        | 513160   | 756      | 358      | 671338   |
| LS4     | 7.11          | 50534134  | 49588226    | 38608410        | 494060   | 739      | 356      | 643000   |
| LS5     | 6.93          | 49286270  | 48146916    | 35459918        | 655943   | 577      | 342      | 795110   |
| LS6     | 7.82          | 55597704  | 54790614    | 46058672        | 551877   | 754      | 359      | 726418   |
| HS1     | 7.92          | 56328220  | 54977526    | 43029734        | 640524   | 651      | 351      | 804041   |
| HS2     | 7.43          | 52843950  | 51970682    | 41370226        | 598861   | 659      | 351      | 753379   |
| HS3     | 7.82          | 55636696  | 54688826    | 43417316        | 679906   | 661      | 351      | 860413   |
| HS4     | 7.96          | 56634582  | 55838228    | 43330876        | 661874   | 674      | 353      | 835015   |
| HS5     | 8.43          | 59914180  | 59259350    | 44020278        | 672081   | 642      | 351      | 825617   |
| HS6     | 7.99          | 56824526  | 55927400    | 39087666        | 600413   | 631      | 349      | 734504   |
| Total   | 132           | 938937292 | 923462282   | 702402832       | 10039082 | 11831    | 6294     | 12582954 |
| Mean    | 7.34          | 52163183  | 51303460    | 39022380        | 557727   | 657      | 350      | 699053   |
| SEM     | 0.24          | 1706771   | 1699041     | 1623877         | 32562    | 19       | 1.92     | 40259    |

<sup>1</sup>CON = basal diet; LS = basal diet + 2.4 mg/kg SY; HS = basal diet + 4.8 mg/kg SY; SEM = standard error of mean.
