# Supplementary material for: The Effects of Selenium on Rumen Fermentation Parameters and Microbial Metagenome in Goats
Source: MDPI journal article supplement (doi:10.3390/fermentation8050240), 2022-05-21
Supplement: s1 [file s1]

**Supplementary Table S1** Linear regression equation of standard for volatile fatty acids.

| Item            | Retention time (min) | Linear equation           | Correlation coefficient (r) |
|-----------------|----------------------|---------------------------|-----------------------------|
| Acetic acid     | 4.59                 | $y = 0.0365x + 0.0562$    | 0.9929                      |
| Propionic acid  | 5.64                 | $y = 0.0617x + 0.0024$    | 0.9932                      |
| Butyric acid    | 6.02                 | $y = 0.1357x + 0.0021$    | 0.9975                      |
| Valeric acid    | 6.92                 | $y = 0.237x + 0.0175$     | 0.9980                      |
| Caproic acid    | 7.55                 | $y = 0.3179x - 0.0000004$ | 0.9946                      |
| Isobutyric acid | 8.69                 | $y = 0.2194x - 0.0016$    | 0.9934                      |
| Isovaleric acid | 10.17                | $y = 0.7933x - 0.0013$    | 0.9927                      |
